# Supplementary material for: Efficient Trost's γ-addition catalyzed by reusable polymer-supported triphenylphosphine in aqueous media
Source: Royal Society of Chemistry journal article supplement (doi:10.1039/b506881a), 2005-01-01
Supplement: b506881a.doc [file b506881a.doc]

# Supporting information

## **Efficient -Addition Catalyzed by Polymer-Supported Triphenylphosphine in Aqueous Media**

Rachid Skouta,1Rajender S. Varma2 and Chao-Jun Li*1

*1Department of Chemistry, McGill University, 801 Sherbrooke St. West, Montreal QC H3A 2K6, Canada; Email:* [*cj.li@mcgill.ca*](mailto:cj.li@mcgill.ca)*.*

*2National Risk Management Research Lab, U.S. Environmental Protection Agency, Cincinnati, Ohio 45268, USA;*

### Contents

**1) Experimental details and characterization data for all new compounds**

**General information:** 1H NMR spectra were recorded on Varian 300 and 400 MHz spectrometer in CDCl3 solution and the chemical shifts were reported in parts per million (δ) relative to internal standard TMS (0 ppm). The peak patterns are indicated as follows: s, singlet; d, doublet; t, triplet; dt, doublet of triplet; ddd, doublet of doublet of doublet; m, multiplet; q, quartet; st, septet. The coupling constants, *J*, are reported in Hertz (Hz). 13C NMR spectra were obtained at 75 and 100 MHz and referenced to the internal solvent signals (central peak is 77.00 ppm). MS data were obtained by Agilent 6890N Network GC System/Agilent 5973 Mass Selective Detector. HRMS were made by McGill University.IR spectra were recorded by an ABB Bomem MB100 instrument. Thin layer chromatography was performed using Sorbent Silica Gel 60 F254 TLC plates and visualized with ultraviolet light. All reagents were weighed and handled in air, and backfilled under an inert atmosphere of nitrogen at room temperature. All reagents were purchased from Aldrich, Strem and Across and used without further purification. Nitrogen was bubbled in water for 4 hours.

**5-tert-Butoxycarbonyl-hex-2-enedioic acid 6-tert-butyl ester 1-methyl ester (3b).** CA registry Number: [rs227]. Isolated by flash column chromatography (hexane/ethyl acetate=10:1; Rf=0.27. IR (liquid film): νmax  2980, 2935, 1732, 1661, 1479, 1458, 1394, 1370, 1273, 1143, 1039, 977, 848, cm-1; 1H NMR (CDCl3, 400MHz, ppm) *δ* 6.89(dt, *J* = 15.2, 7.1Hz, 1H), 5.82(d, *J* = 15.2Hz, 1H), 3.71(s, 3H), 3.28(t, *J* = 7.3Hz, 1H), 2.69(dt, *J* = 7.1, 1.4 Hz, 2H), 1.45(s, 18H); 13C NMR (CDCl3, 75MHz, ppm) *δ* 167.82, 166.65, 144.99, 123.18, 82.26, 52.76, 51.83, 31.49, 28.25; MS (EI) *m/z* (%) 258(M+- C4H8), 243, 227, 202, 184, 166, 158, 141, 126, 109, 99, 81, 71, 57(100), 41; HRMS calcd for C12H18O6 : 258.11034; found: 258.10987.

**5-Benzyloxycarbonyl-hex-2-enedioic acid 6-benzyl ester 1-methyl ester (3c).** CA registry Number: [rs222]. Isolated by flash column chromatography (hexane/ethyl acetate=5:1; Rf=0.32. IR (liquid film): νmax  3034, 2951, 1730, 1661, 1498, 1456, 1436, 1378, 1270, 1226, 1154, 1027, 981, 751, cm-1; 1H NMR (CDCl3, 300MHz, ppm) *δ* 7.32-7.27(m, 10H), 6.85(dt, *J* = 15.5, 7.1Hz, 1H), 5.84(d, *J* = 15.5Hz, 1H), 5.13(s, 4H), 3.70(s, 3H), 3.59(t, *J* = 7.3Hz, 1H), 2.80(t, *J* = 7.1Hz, 2H); 13C NMR (CDCl3, 75MHz, ppm) *δ* 167.48, 165.99, 143.44, 134.77, 128.35, 128.27, 128.04, 123.41, 67.36, 51.49, 50.54, 31.02; MS (EI) *m/z* (%) 382(M+), 351, 338, 291, 259, 241, 202, 185(100), 167, 129, 107, 91, 77, 51; HRMS calcd for C20H20O6 : 382.14030; found: 382.14086.

**5-tert-Butoxycarbonyl-hex-2-enedioic acid dimethyl ester (3d).** CA registry Number: [rs229]. Isolated by flash column chromatography (hexane/ethyl acetate=5:1; Rf=0.18. IR (liquid film): νmax  2981, 2954, 1749, 1661, 1437, 1394, 1370, 1273, 1200, 1148, 1100, 1032, 985, 844 cm-1; 1H NMR (CDCl3, 300MHz, ppm) *δ* 6.88(dt, *J* = 15.1, 7.0Hz, 1H), 5.91(d, *J* = 15.1Hz, 1H), 3.73(s, 3H), 3.71(s, 3H), 3.41(t, *J* = 7.3Hz, 1H), 2.75(dt, *J* = 7.1, 1.4 Hz, 2H), 1.45(s, 9H); 13C NMR (CDCl3, 75MHz, ppm) *δ* 169.24, 167.41, 166.53, 144.50, 123.42, 82.75, 52.84, 51.83, 51.72, 31.76, 28.18; MS (EI) *m/z* (%) 216(M+- C4H8), 198, 185, 166(100), 140, 112, 108, 81, 71, 57, 41; HRMS calcd for C9H12O6 : 216.06339; found: 216.06305.

**5-tert-Butoxycarbonyl-hex-2-enedioic acid dimethyl ester (3e).** CA registry Number: [rs230]. Isolated by flash column chromatography (hexane/ethyl acetate=10:1; Rf=0.27. IR (liquid film): νmax  2984, 2947, 2881, 1732, 1662, 1468, 1437, 1387, 1375, 1272, 1104, 980, 906, 835 cm-1; 1H NMR (CDCl3, 300MHz, ppm) *δ* 6.88(dt, *J* = 15.5, 7.3Hz, 1H), 5.88(d, *J* = 15.5Hz, 1H), 5.03(st, *J* = 6.4Hz, 2H), 3.71(s, 3H), 3.40(t, *J* = 7.3Hz, 1H), 2.76(dt, *J* = 7.3, 1.5 Hz, 2H), 1.24(s, *J* = 6.4Hz, 12H); 13C NMR (CDCl3, 75MHz, ppm) *δ* 167.99, 166.56, 144.50, 123.48, 69.59, 51.86, 51.27, 31.39, 22.00, 21.94; MS (EI) *m/z* (%) 286(M+), 244, 227, 213, 202, 184(100), 166, 141, 126, 108, 97, 81, 53, 43; HRMS calcd for C14H22O6 : 286.14164; found: 286.14099.

**5-Methoxycarbonyl-5-methyl-hex-2-enedioic acid dimethyl ester (3h).** CA registry Number: [rs216b]. Isolated by flash column chromatography (hexane/ethyl acetate=5:1; Rf=0.34. IR (liquid film): νmax  2999, 2955, 2847, 1728, 1659, 1436, 1342, 1277, 1248, 1198, 1171, 1112, 1037, 983, 869 cm-1; 1H NMR (CDCl3, 300MHz, ppm) *δ* 6.82(dt, *J* = 15.5, 7.6Hz, 1H), 5.88(d, *J* = 15.5Hz, 1H), 3.73(s, 6H), 3.72(s, 3H), 2.75(d, *J* = 7.6Hz, 2H), 1.43(s, 3H); 13C NMR (CDCl3, 75MHz, ppm) *δ* 171.83, 166.41, 143.03, 125.03, 53.60, 53.11, 51.92, 38.76, 20.48; MS (EI) *m/z* (%) 244(M+), 212, 181, 169, 153, 137, 125(100), 111, 93, 67, 59; HRMS calcd for C11H16O6 : 244.09469; found: 244.09443
